# Supplementary material
Source: Springer Nature journal article supplement (https://www.springermedizin.de/resource/supplementary/12885_2009_1876_MOESM5_ESM.pdf/9461464)
Supplement: MOESM5 [file 9461464]

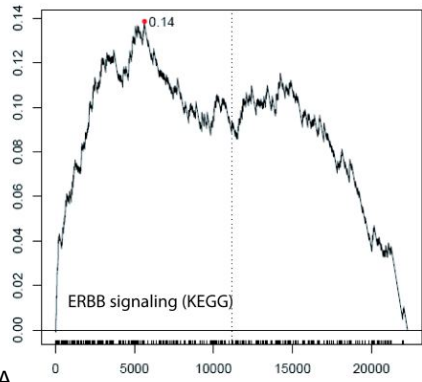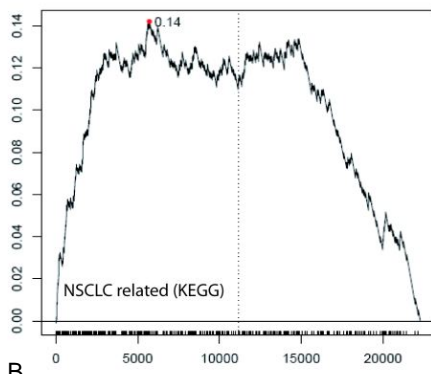

| Gene Set       | ES score | Nominal p-value | FDR  |
|----------------|----------|-----------------|------|
| ERBB_signaling | 0.14     | 0.00            | 0.00 |
| NSCLC          | 0.14     | 0.00            | 0.00 |
| EGFR_SMRT      | 0.14     | 0.00            | 0.00 |
| FAS            | 0.23     | 0.00            | 0.00 |

A

B

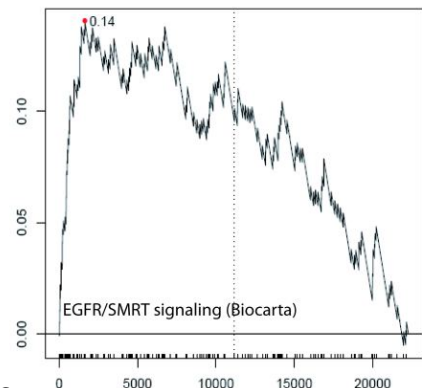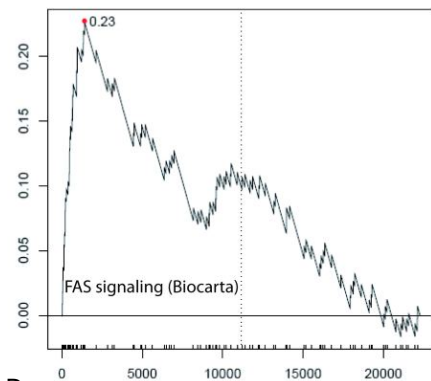

C

D

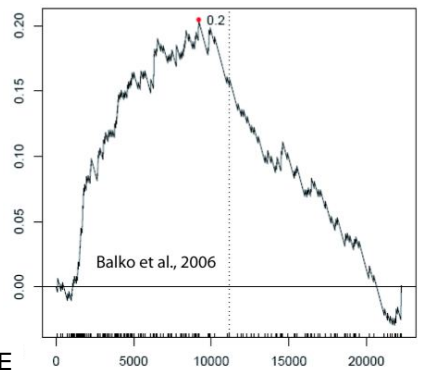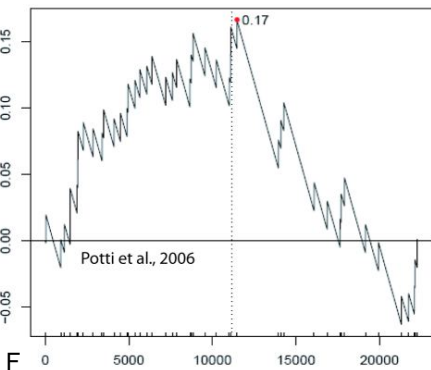

E

F

| Gene Set    | ES score | Nominal p-value | FDR  |
|-------------|----------|-----------------|------|
| Balko_2006  | 0.20     | 0.00            | 0.00 |
| Larsen_2006 | 0.05     | 0.95            | 0.95 |
| Potti_2006  | 0.17     | 0.15            | 0.20 |
| Cheng_2008  | 0.49     | 0.02            | 0.03 |

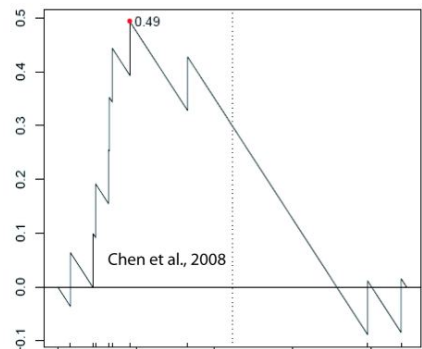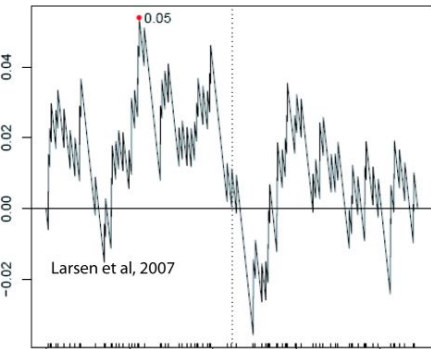

G

H
